# Supplementary material for: Continuous mutation of SARS-CoV-2 during migration via three routes at the beginning of the pandemic
Source: PeerJ. 2022 Mar 30;10:e12681. doi: 10.7717/peerj.12681 (PMC8976469; doi:10.7717/peerj.12681)
Supplement: Supplemental Information 5 — The full list of acknowledgements is in Figshare (Konishi, 2021a). [file peerj-10-12681-s005.xlsx]

## Sheet: S1
	County/region	Number of records
	USA	2656
	England	1064
	Australia	994
	Netherlands	469
	Iceland	468
	china	382
	Belgium	327
	Scotland	287
	Wales	252
	Denmark	250
	France	213
	Spain	153
	Russia	150
	Luxembourg	143
	Canada	124
	Portugal	99
	Japan	96
	Singapore	74
	Taiwan	67
	Germany	63
	Switzerland	55
	Sweden	50
	Italy	44
	Brazil	40
	India	35
	Finland	33
	Turkey	29
	Argentina	26
	Czech_Republic	26
	DRC	25
	Korea	23
	Thailand	22
	Norway	21
	Jordan	20
	Austria	18
	Senegal	18
	Georgia	13
	Mexico	13
	Malaysia	12
	South_Korea	12
	Ireland	10
	Latvia	9
	Poland	9
	Kuwait	8
	Vietnam	8
	Chile	7
	South_Africa	6
	Greece	5
	New_Zealand	4
	Qatar	4
	Slovakia	4
	Slovenia	4
	Sri_Lanka	4
	Algeria	3
	Gambia	3
	Hungary	3
	Lishui	3
	Saudi_Arabia	3
	Israel	2
	Cambodia	1
	Colombia	1
	Lithuania	1
	Nepal	1
	NewZealand	1
	Pakistan	1
	Panama	1
	Peru	1
	tiger	1
